# Supplementary material for: Cryo-sensitive aggregation triggers NLRP3 inflammasome assembly in cryopyrin-associated periodic syndrome
Source: eLife. 2022 May 26;11:e75166. doi: 10.7554/eLife.75166 (PMC9177154; doi:10.7554/eLife.75166)
Supplement: Figure 1—source data 3. [file elife-75166-fig1-data3.csv]

Slice	Speck_count	Nuclei_count
ASCGFP32-1.oif.filesC2.tif	9	521
ASCGFP32-2.oif.filesC2.tif	14	328
ASCGFP32-3.oif.filesC2.tif	13	526
ASCGFP32-4.oif.filesC2.tif	25	712
ASCGFP37-1.oif.filesC2.tif	19	916
ASCGFP37-2.oif.filesC2.tif	25	752
ASCGFP37-3.oif.filesC2.tif	21	891
ASCGFP37-4.oif.filesC2.tif	17	835
