# Supplementary material for: Cryo-sensitive aggregation triggers NLRP3 inflammasome assembly in cryopyrin-associated periodic syndrome
Source: eLife. 2022 May 26;11:e75166. doi: 10.7554/eLife.75166 (PMC9177154; doi:10.7554/eLife.75166)
Supplement: Figure 6—figure supplement 1—source data 1. [file elife-75166-fig6-figsupp1-data1.csv]

Slice	Tim	D303N-	D303NDOX
D001	180	0	16
D002	185	1	10
D003	190	1	17
D004	195	0	24
D005	200	1	26
D006	205	1	26
D007	210	1	23
D008	215	1	31
D009	220	0	28
D010	225	0	24
D011	230	0	23
D012	235	0	24
D013	240	0	15
D014	245	0	19
D015	250	0	24
D016	255	0	23
D017	260	0	23
D018	265	0	19
D019	270	1	27
D020	275	0	18
D021	280	1	16
D022	285	1	19
D023	290	2	18
D024	295	2	13
D025	300	2	18
D026	305	0	11
D027	310	1	11
D028	315	1	12
D029	320	0	19
D030	325	1	12
D031	330	0	9
D032	335	0	14
D033	340	0	11
D034	345	0	13
D035	350	0	8
D036	355	0	6
Nuclei	N.A.	533	870
