# Supplementary material for: Cryo-sensitive aggregation triggers NLRP3 inflammasome assembly in cryopyrin-associated periodic syndrome
Source: eLife. 2022 May 26;11:e75166. doi: 10.7554/eLife.75166 (PMC9177154; doi:10.7554/eLife.75166)
Supplement: Figure 6—source data 2. [file elife-75166-fig6-data2.csv]

	Ca-	Ca-DOX	Ca+	Ca+DOX
Fluo-8_180min	1	2	1	1
Fluo-8_185min	1	1	0	1
Fluo-8_190min	0	0	1	0
Fluo-8_195min	0	1	0	0
Fluo-8_200min	0	1	1	0
Fluo-8_205min	1	0	1	0
Fluo-8_210min	0	1	1	0
Fluo-8_215min	1	1	2	0
Fluo-8_220min	1	0	2	0
Fluo-8_225min	1	0	0	0
Fluo-8_230min	0	0	0	0
Fluo-8_235min	0	0	0	0
Fluo-8_240min	0	0	0	0
Fluo-8_245min	0	0	2	0
Fluo-8_250min	0	0	1	0
Fluo-8_255min	0	0	0	2
Fluo-8_260min	2	0	1	2
Fluo-8_265min	1	1	1	4
Fluo-8_270min	0	0	1	1
Fluo-8_275min	1	0	1	2
Fluo-8_280min	0	0	0	5
Fluo-8_285min	0	0	0	1
Fluo-8_290min	0	0	0	2
Fluo-8_295min	0	0	0	2
Fluo-8_300min	0	1	2	4
Fluo-8_305min	0	1	0	3
Fluo-8_310min	0	1	0	3
Fluo-8_315min	0	1	1	4
Fluo-8_320min	0	1	1	7
Fluo-8_325min	0	1	1	9
Fluo-8_330min	0	1	2	9
Fluo-8_335min	0	1	0	5
Fluo-8_340min	0	1	0	10
Fluo-8_345min	0	2	0	8
Fluo-8_350min	0	1	0	6
Fluo-8_355min	0	1	0	6
Fluo-8_360min	0	0	0	5
Fluo-8_365min	0	0	0	4
Fluo-8_370min	0	1	1	9
Nuclei	676	714	591	661
