# Supplementary material for: Cryo-sensitive aggregation triggers NLRP3 inflammasome assembly in cryopyrin-associated periodic syndrome
Source: eLife. 2022 May 26;11:e75166. doi: 10.7554/eLife.75166 (PMC9177154; doi:10.7554/eLife.75166)
Supplement: Figure 7—source data 1. [file elife-75166-fig7-data1.csv]

	DMSO	DMSO+DOX	VX	VX+DOX
Fluo-8_180min	1	4	1	2
Fluo-8_185min	4	4	1	3
Fluo-8_190min	4	3	1	1
Fluo-8_195min	1	2	1	0
Fluo-8_200min	1	4	1	0
Fluo-8_205min	2	3	2	2
Fluo-8_210min	2	3	2	1
Fluo-8_215min	1	3	2	0
Fluo-8_220min	2	4	0	1
Fluo-8_225min	1	4	3	0
Fluo-8_230min	1	5	1	0
Fluo-8_235min	0	5	2	0
Fluo-8_240min	1	7	2	3
Fluo-8_245min	1	6	1	0
Fluo-8_250min	2	6	2	1
Fluo-8_255min	2	5	3	1
Fluo-8_260min	2	8	4	4
Fluo-8_265min	2	9	2	0
Fluo-8_270min	3	4	1	0
Fluo-8_275min	1	9	0	0
Fluo-8_280min	0	8	0	0
Fluo-8_285min	2	5	0	3
Fluo-8_290min	0	12	2	1
Fluo-8_295min	0	10	3	2
Fluo-8_300min	0	7	0	0
Fluo-8_305min	1	8	0	0
Fluo-8_310min	0	11	0	0
Fluo-8_315min	0	12	1	0
Fluo-8_320min	1	11	0	0
Fluo-8_325min	0	8	0	0
Fluo-8_330min	0	7	0	0
Fluo-8_335min	2	11	2	2
Fluo-8_340min	0	10	0	1
Fluo-8_345min	1	11	0	2
Fluo-8_350min	0	11	1	1
Fluo-8_355min	0	15	1	0
Fluo-8_360min	1	9	1	1
Fluo-8_365min	0	7	0	0
Fluo-8_370min	0	9	0	0
Nuclei	617	666	621	525
