# Supplementary material for: Cryo-sensitive aggregation triggers NLRP3 inflammasome assembly in cryopyrin-associated periodic syndrome
Source: eLife. 2022 May 26;11:e75166. doi: 10.7554/eLife.75166 (PMC9177154; doi:10.7554/eLife.75166)
Supplement: Figure 7—source data 3. [file elife-75166-fig7-data3.csv]

	DMSO	DMSODOX	VX765	VX765+DOX
Speck_count3h	10	13	10	11
Speck_count4h	12	23	5	11
Speck_count5h	13	71	4	22
Speck_count6h	10	152	8	65
Nuclei_count	800	902	865	905
