# Supplementary material for: Cryo-sensitive aggregation triggers NLRP3 inflammasome assembly in cryopyrin-associated periodic syndrome
Source: eLife. 2022 May 26;11:e75166. doi: 10.7554/eLife.75166 (PMC9177154; doi:10.7554/eLife.75166)
Supplement: Figure 7—source data 4. [file elife-75166-fig7-data4.csv]

Slice	Time	sgGFP-	sgGFPDOX	sgCASP1-	sgCASP1DOX
D001	180	5	4	1	2
D002	185	2	1	0	3
D003	190	1	3	0	2
D004	195	2	2	1	2
D005	200	3	3	1	5
D006	205	4	1	1	2
D007	210	1	0	1	4
D008	215	2	0	0	3
D009	220	1	2	0	3
D010	225	0	3	1	4
D011	230	0	1	0	2
D012	235	0	2	1	2
D013	240	0	8	1	1
D014	245	0	5	1	2
D015	250	1	2	1	0
D016	255	0	1	0	2
D017	260	1	2	2	4
D018	265	0	3	1	4
D019	270	0	3	1	3
D020	275	0	2	1	3
D021	280	1	4	1	3
D022	285	2	5	1	2
D023	290	1	11	0	1
D024	295	0	7	1	1
D025	300	2	4	0	1
D026	305	0	9	1	1
D027	310	0	6	2	0
D028	315	0	6	1	0
D029	320	0	10	1	0
D030	325	0	11	0	0
D031	330	0	10	1	2
D032	335	0	7	1	0
D033	340	1	4	1	2
D034	345	0	6	2	1
D035	350	0	8	1	3
D036	355	0	5	1	2
Nuclei	N.A.	845	791	997	945
