# Supplementary material for: Cryo-sensitive aggregation triggers NLRP3 inflammasome assembly in cryopyrin-associated periodic syndrome
Source: eLife. 2022 May 26;11:e75166. doi: 10.7554/eLife.75166 (PMC9177154; doi:10.7554/eLife.75166)
Supplement: Figure 8—figure supplement 1—source data 1. [file elife-75166-fig8-figsupp1-data1.csv]

Slice	Time	nil	DOX
D001	180	0	1
D002	185	0	1
D003	190	0	0
D004	195	1	4
D005	200	0	0
D006	205	1	3
D007	210	0	1
D008	215	0	1
D009	220	1	0
D010	225	0	1
D011	230	0	1
D012	235	1	4
D013	240	1	4
D014	245	2	5
D015	250	1	2
D016	255	0	2
D017	260	0	6
D018	265	1	5
D019	270	0	3
D020	275	1	3
D021	280	1	6
D022	285	1	5
D023	290	1	5
D024	295	0	6
D025	300	0	5
D026	305	0	2
D027	310	1	2
D028	315	1	0
D029	320	1	0
D030	325	2	1
D031	330	0	1
D032	335	1	3
D033	340	1	4
D034	345	1	6
D035	350	2	3
D036	355	1	2
Nuclei	N.A.	695	639
