# Supplementary material for: Cryo-sensitive aggregation triggers NLRP3 inflammasome assembly in cryopyrin-associated periodic syndrome
Source: eLife. 2022 May 26;11:e75166. doi: 10.7554/eLife.75166 (PMC9177154; doi:10.7554/eLife.75166)
Supplement: Figure 8—figure supplement 1—source data 2. [file elife-75166-fig8-figsupp1-data2.csv]

Slice	Time	DMSODOX	VXDOX
D001	180	2	1
D002	185	2	1
D003	190	3	1
D004	195	0	1
D005	200	3	1
D006	205	2	1
D007	210	2	2
D008	215	3	1
D009	220	1	1
D010	225	5	1
D011	230	5	1
D012	235	2	1
D013	240	2	1
D014	245	3	1
D015	250	4	1
D016	255	3	1
D017	260	2	1
D018	265	3	1
D019	270	2	1
D020	275	4	1
D021	280	3	1
D022	285	2	2
D023	290	1	0
D024	295	4	2
D025	300	4	0
D026	305	4	0
D027	310	0	1
D028	315	0	0
D029	320	4	1
D030	325	3	0
D031	330	2	2
D032	335	5	1
D033	340	2	1
D034	345	5	0
D035	350	0	1
D036	355	2	0
Nuclei	N.A.	678	714
