# Supplementary figures and images for: Cryo-sensitive aggregation triggers NLRP3 inflammasome assembly in cryopyrin-associated periodic syndrome
Source: eLife journal article supplement (doi:10.7554/elife.75166), 2022-05-26

Figure 1–figure supplement 1

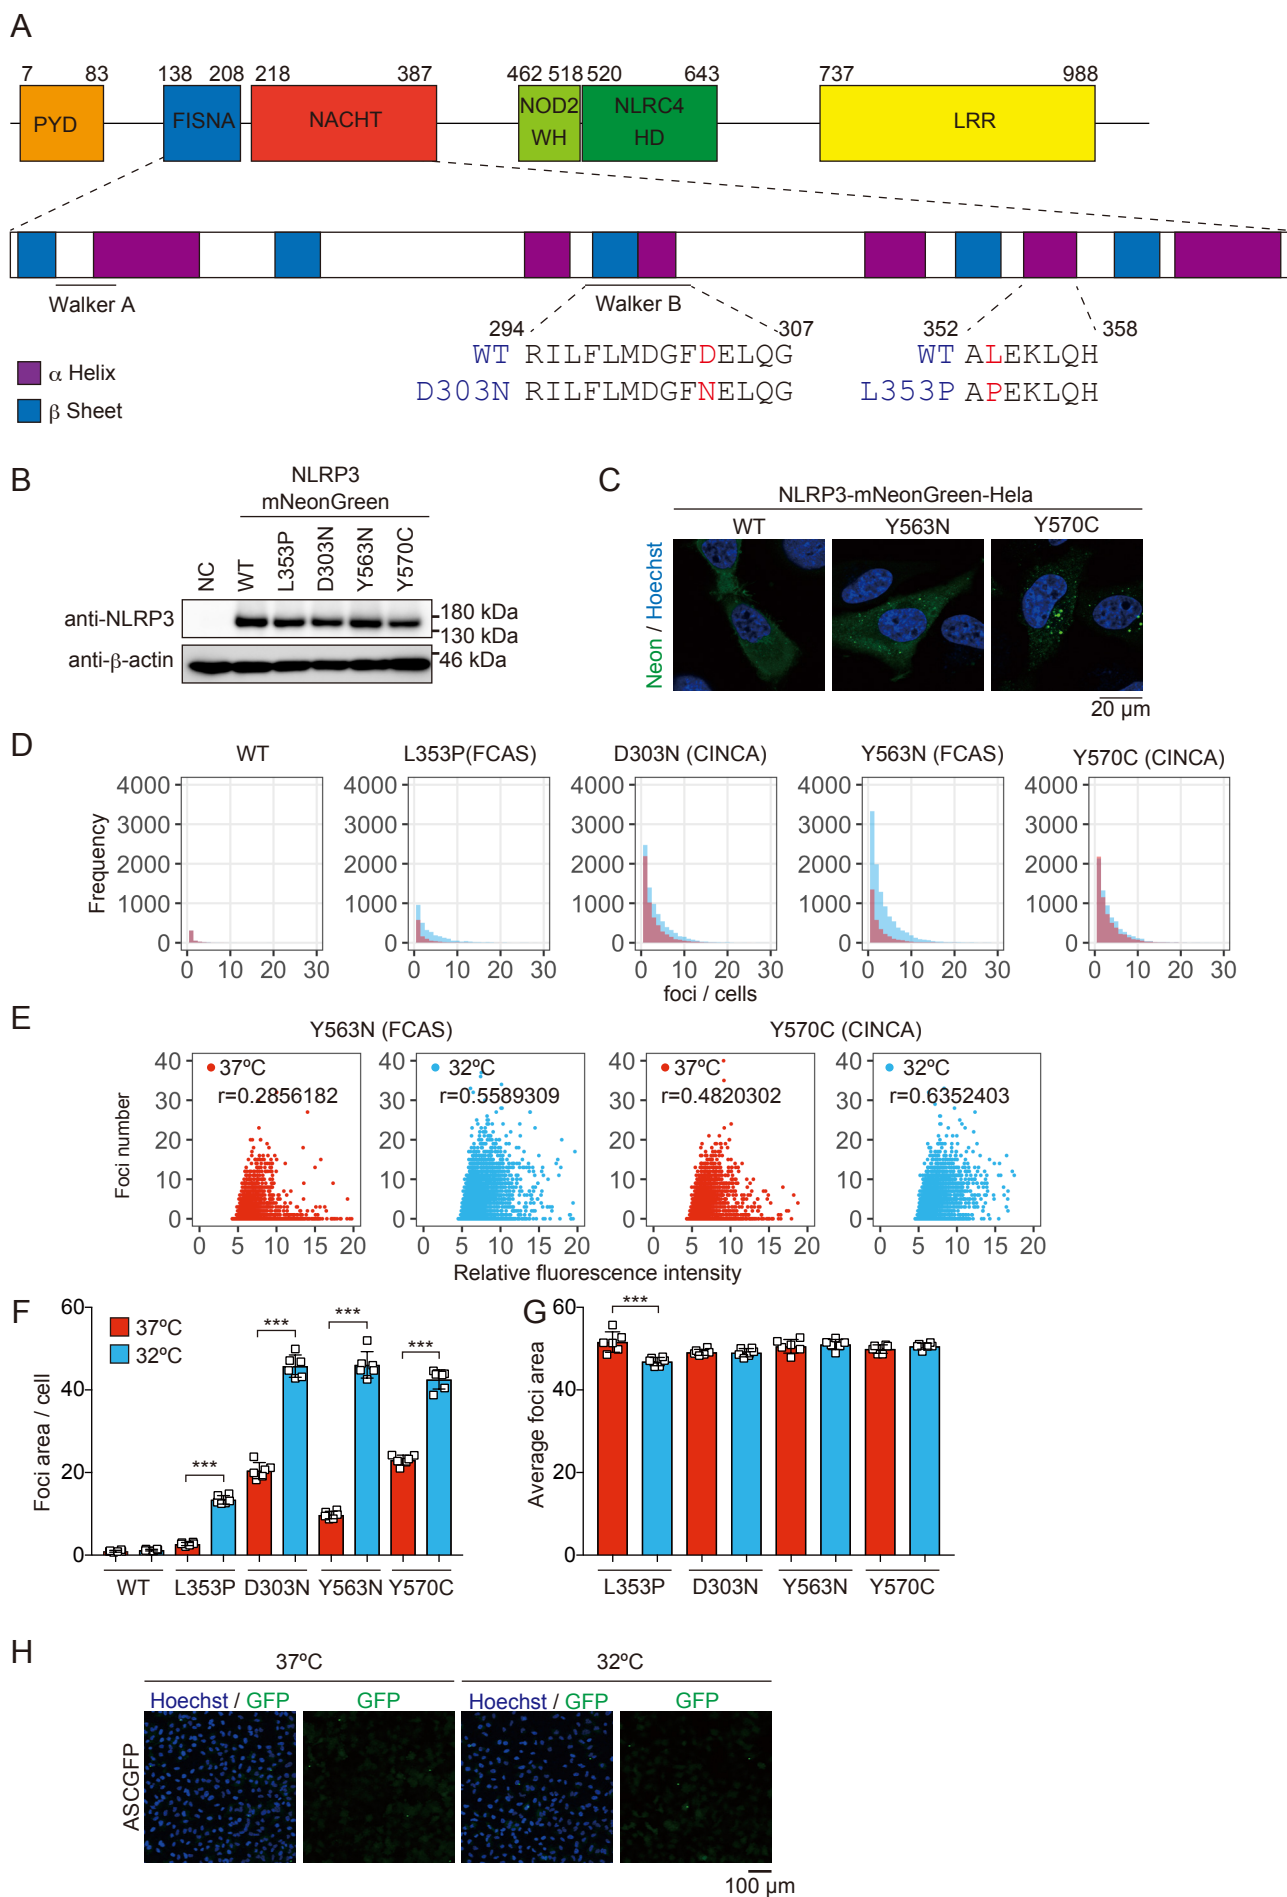

Supplement: supp [file elife-75166-supp-v1.zip]

Figure 5—figure supplement 1

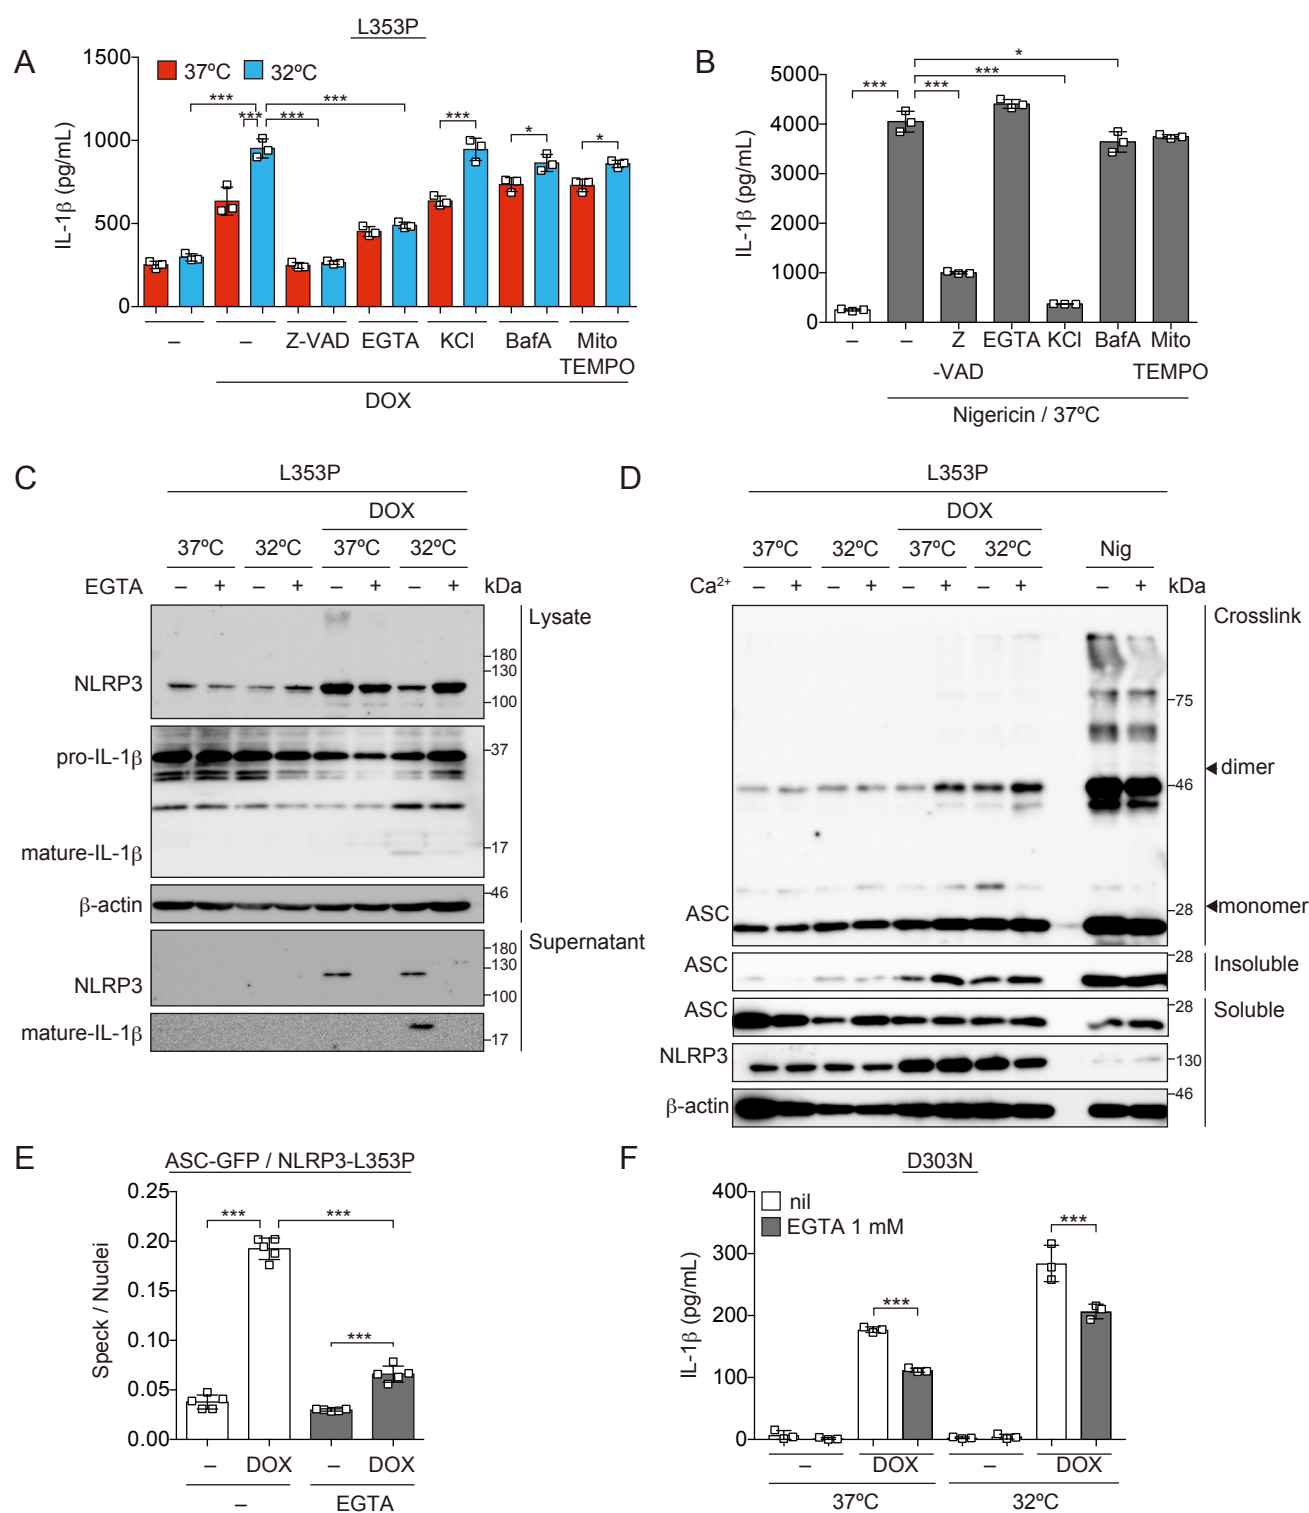

Supplement: supp [file elife-75166-supp-v1.zip]

Figure 7–figure supplement 1

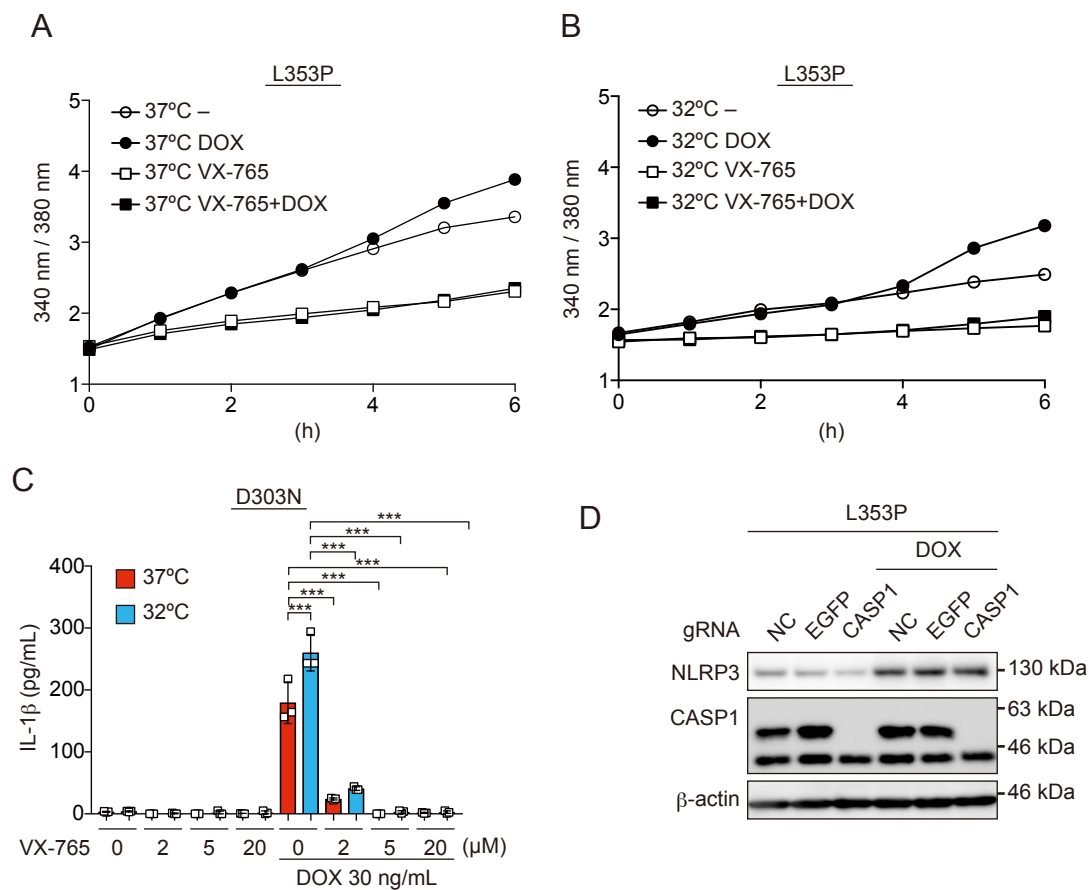

Supplement: supp [file elife-75166-supp-v1.zip]

Figure 6—figure supplement 2

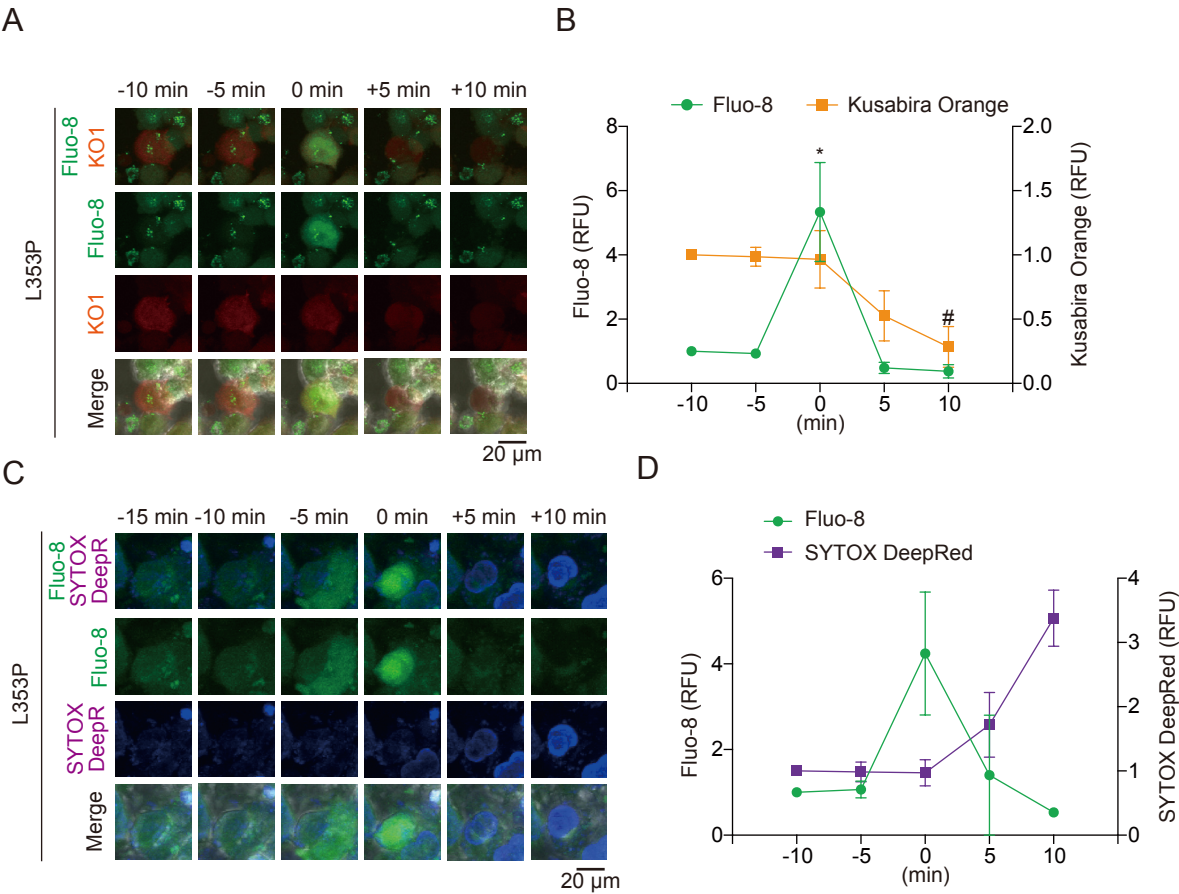

Supplement: supp [file elife-75166-supp-v1.zip]

Figure 5—figure supplement 2

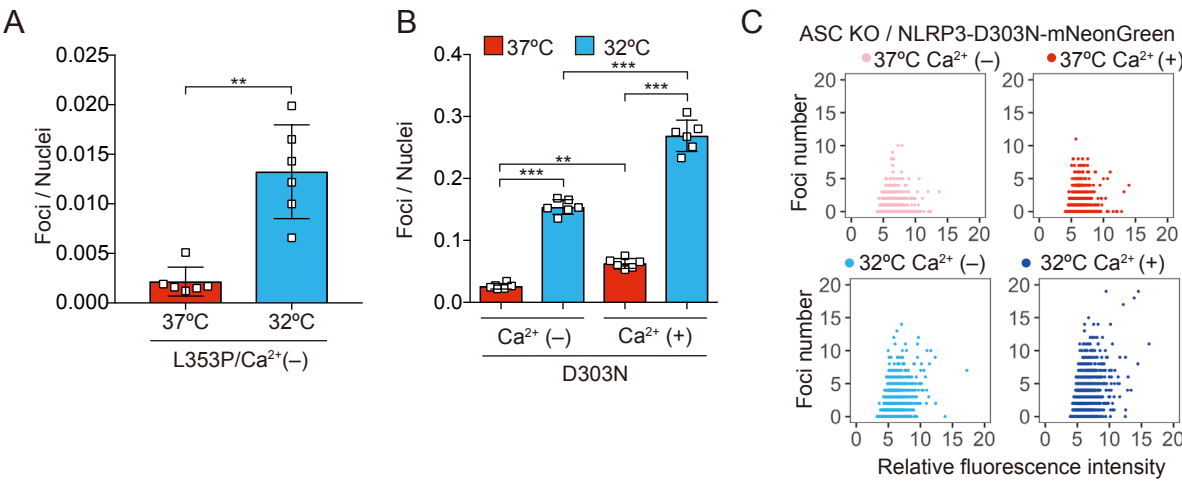

Supplement: supp [file elife-75166-supp-v1.zip]

Figure 3—figure supplement 1

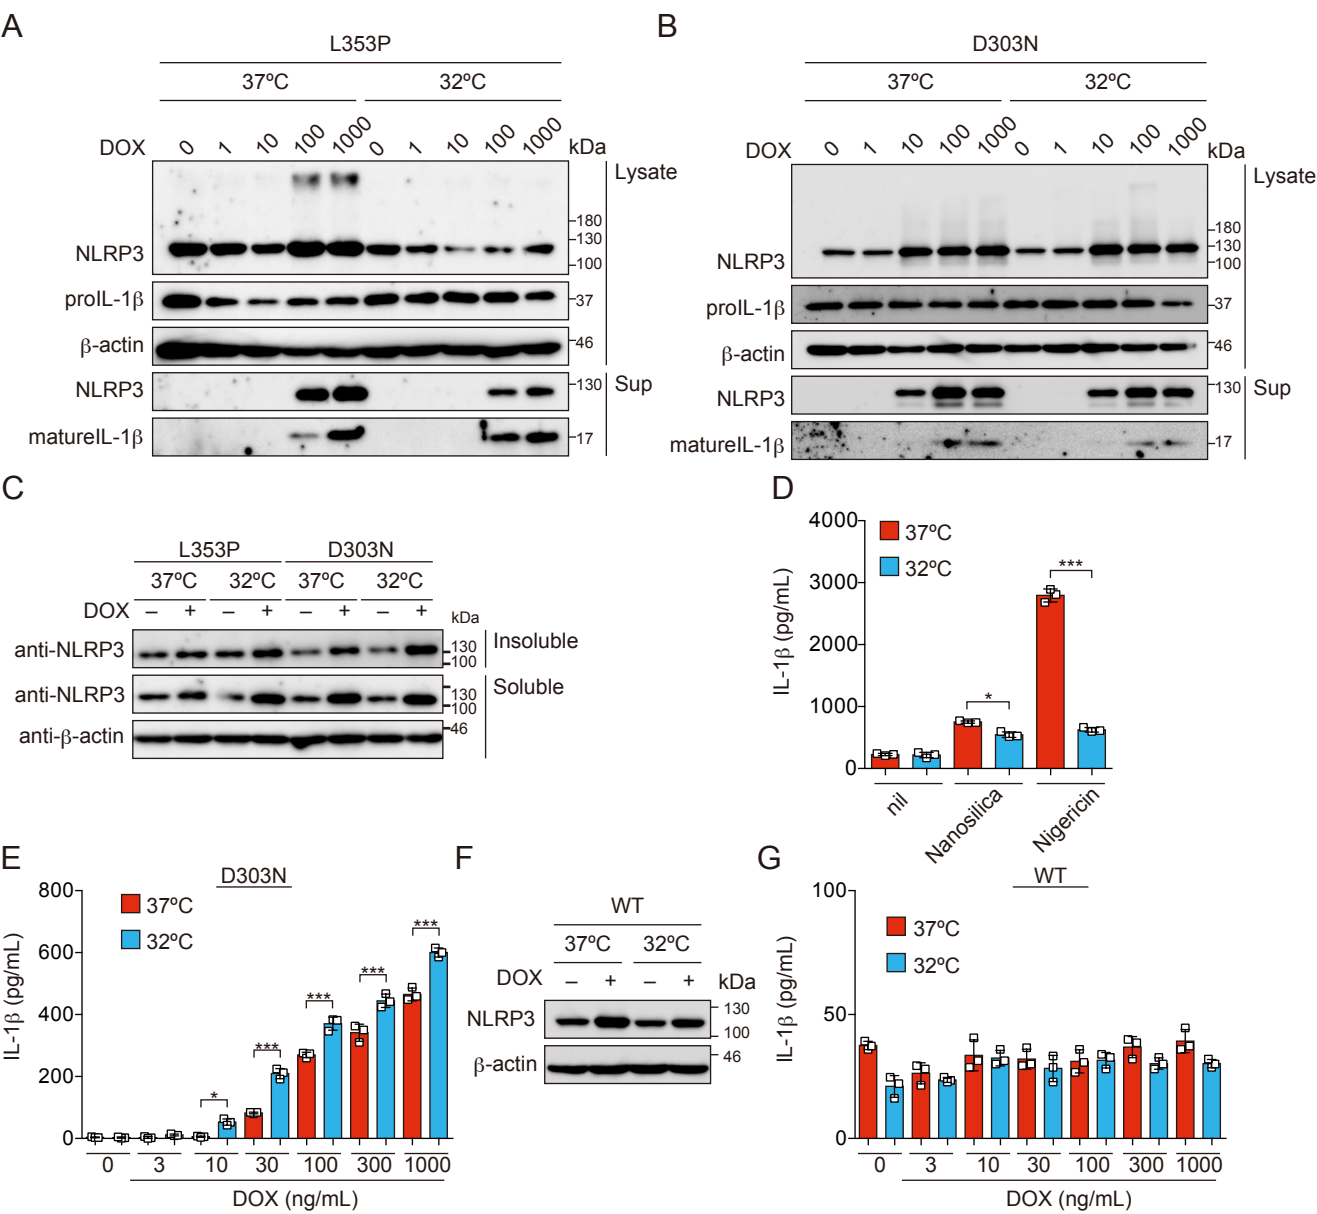

Supplement: supp [file elife-75166-supp-v1.zip]

Figure 8—figure supplement 1

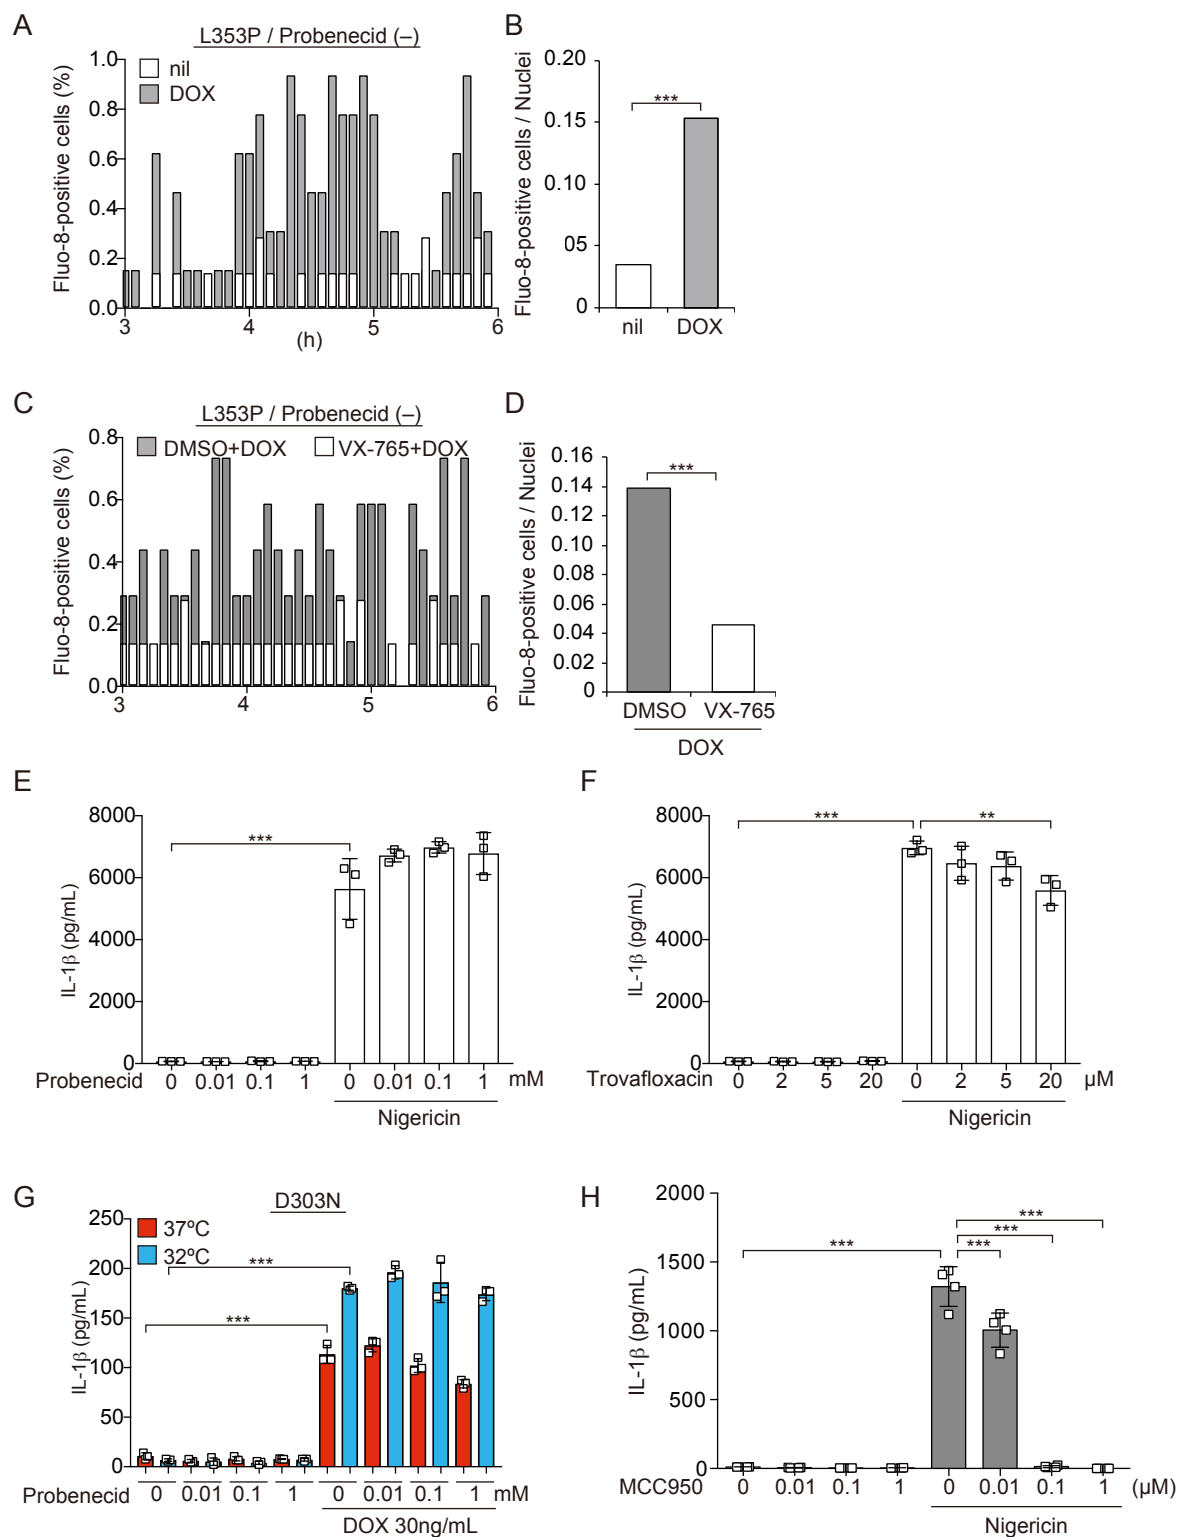

Supplement: supp [file elife-75166-supp-v1.zip]

Figure 2–figure supplement 2

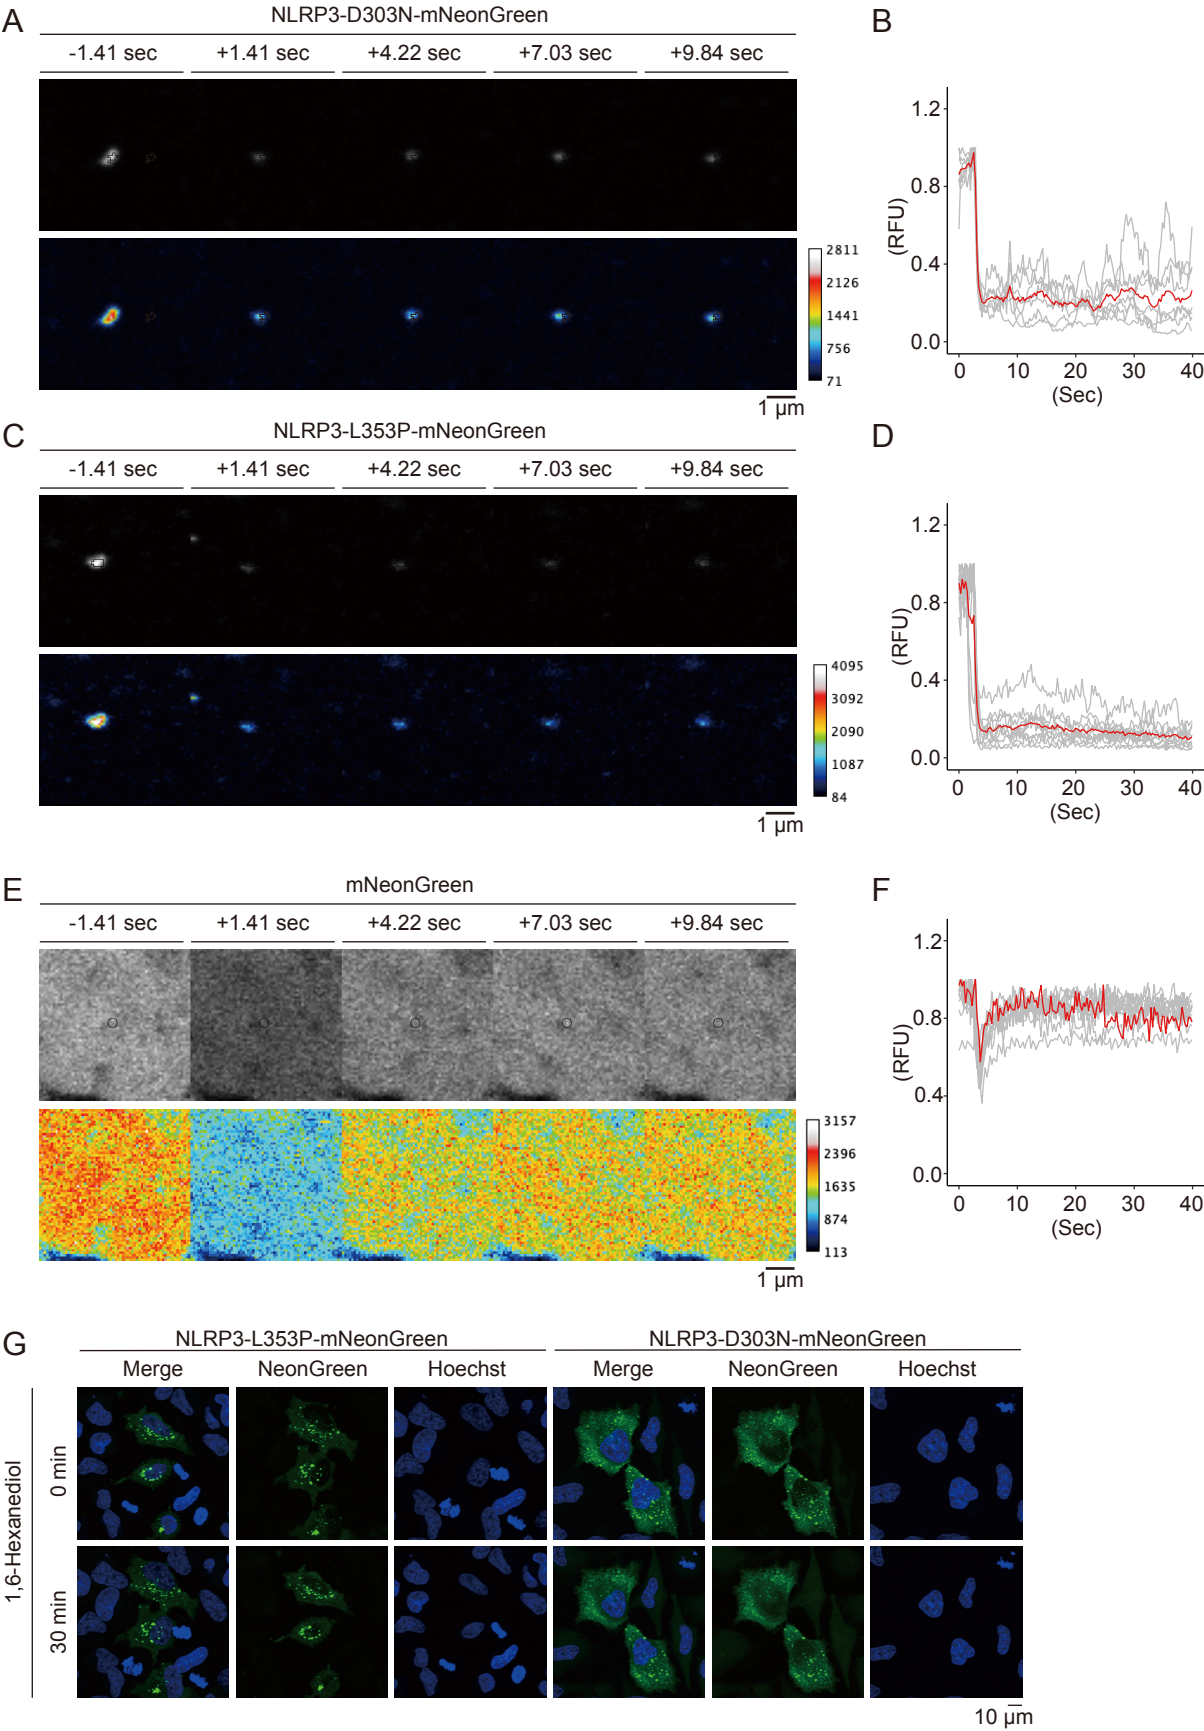

Supplement: supp [file elife-75166-supp-v1.zip]

Figure 6—figure supplement 1

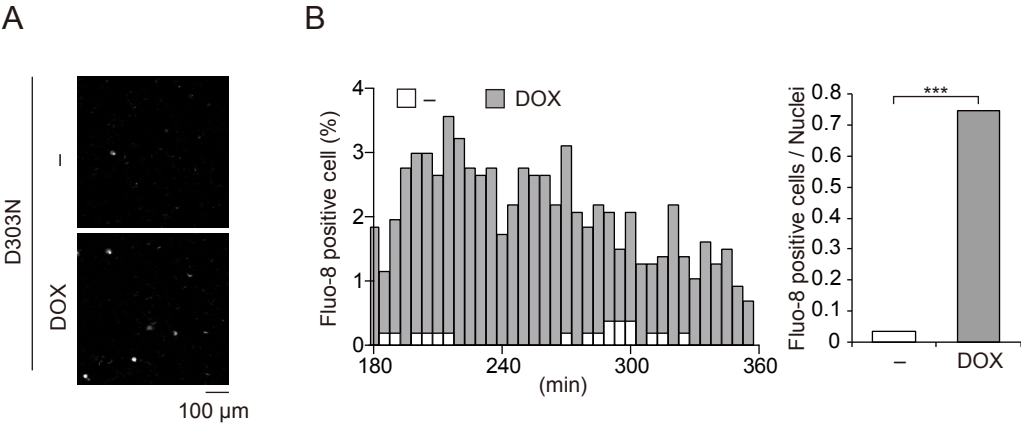

Supplement: supp [file elife-75166-supp-v1.zip]

Figure 4—figure supplement 1

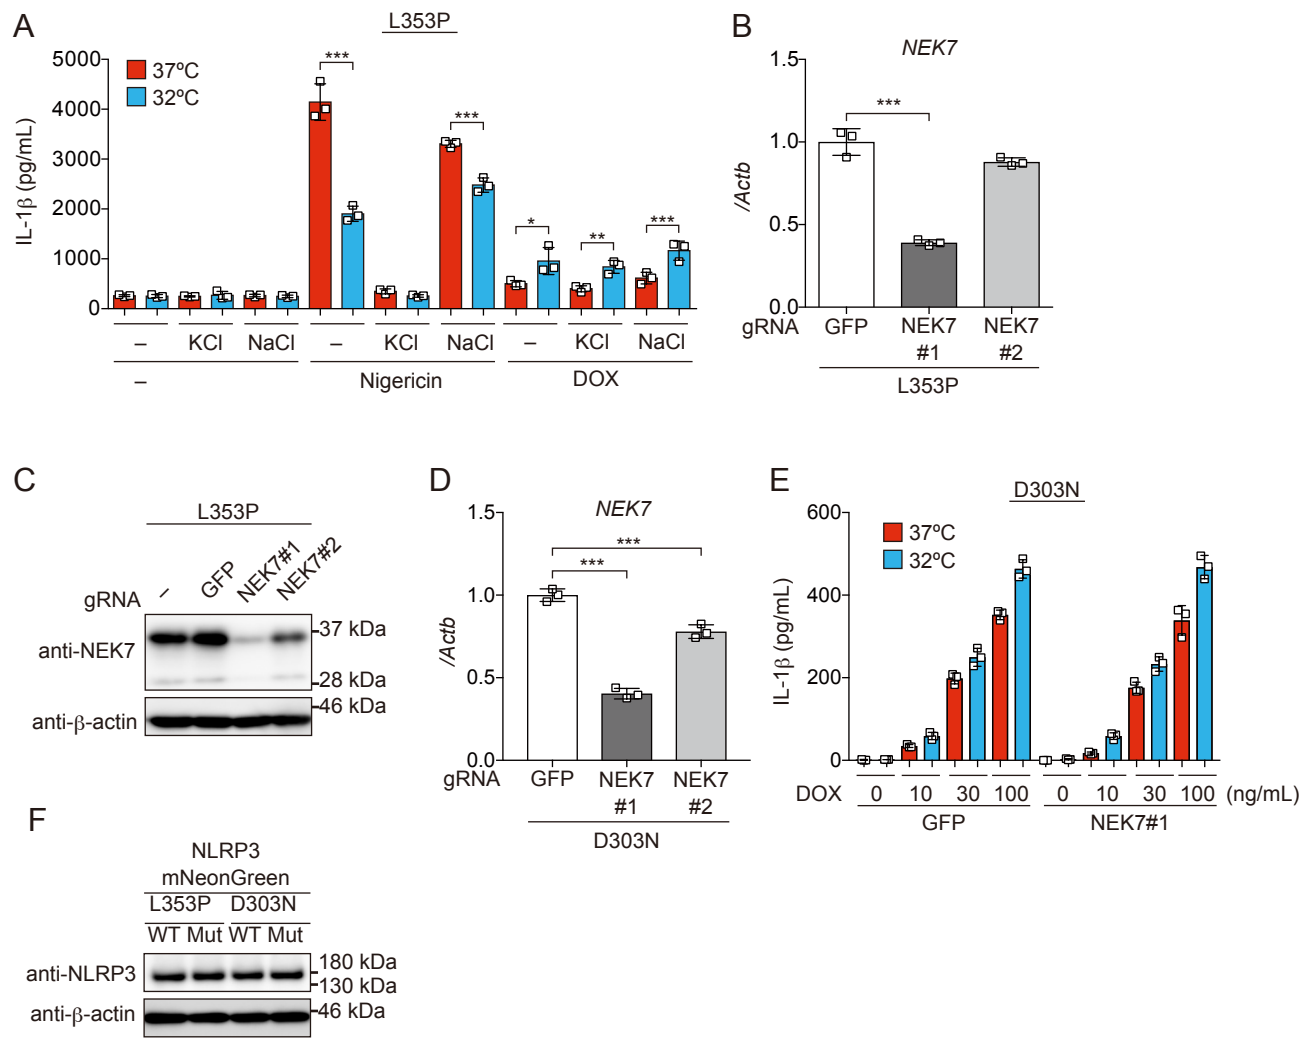

Supplement: supp [file elife-75166-supp-v1.zip]

Figure 2—figure supplement 1

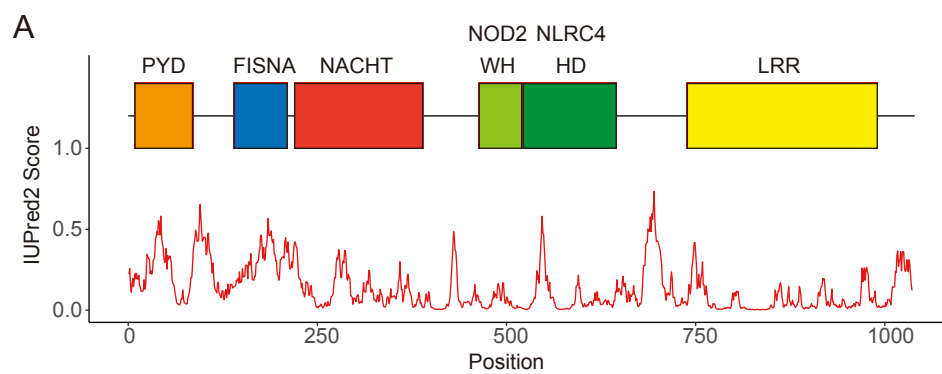

Supplement: supp [file elife-75166-supp-v1.zip]
